# Supplementary material for: Comparative analysis of six common foraminiferal species of the genera &lt;i&gt;Cassidulina&lt;/i&gt;, &lt;i&gt;Paracassidulina&lt;/i&gt;, and &lt;i&gt;Islandiella&lt;/i&gt; from the Arctic–North Atlantic domain
Source: Copernicus journal article supplement (doi:10.5194/jm-40-37-2021), 2021-03-26
Supplement: Supplementary file 1 [file jm-40-37-2021-supplement.pdf]

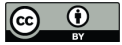

## *Supplement of*

# **Comparative analysis of six common foraminiferal species of the genera *Cassidulina*, *Paracassidulina*, and *Islandiella* from the Arctic–North Atlantic domain**

**Alix G. Cage et al.**

*Correspondence to:* Alix G. Cage ([a.g.cage@keele.ac.uk](mailto:a.g.cage@keele.ac.uk))

The copyright of individual parts of the supplement might differ from the article licence.

**Supplementary Table S1.** Sample details for specimens illustrated in Figs 1-5.

| Species                       | Figure(s)                                                             | Sample details                                                                                                                             | Comments/reference                                                                                                                                                                           |
|-------------------------------|-----------------------------------------------------------------------|--------------------------------------------------------------------------------------------------------------------------------------------|----------------------------------------------------------------------------------------------------------------------------------------------------------------------------------------------|
| <i>Cassidulina laevigata</i>  | 1a, 5 (Holotype original illustration)                                | Unknown                                                                                                                                    | d'Orbigny (1826), Plate 15, Figs 4-5                                                                                                                                                         |
|                               | 1b, 5 (Aperture, Chamber arrangement, Chamber shape, Proloculus area) | core +56-07/728VE, 0-1 cm (56.81922°N, 6.479233°W, 185 m water depth)                                                                      | this study                                                                                                                                                                                   |
|                               | 1c                                                                    | core +56-07/728VE, 0-1 cm (56.81922°N, 6.479233°W, 185 m water depth)                                                                      | this study                                                                                                                                                                                   |
|                               | 1d                                                                    | core +56-07/728VE, 0-1 cm (56.81922°N, 6.479233°W, 185 m water depth)                                                                      | this study                                                                                                                                                                                   |
|                               | 1e                                                                    | core +56-07/728VE, 0-1 cm (56.81922°N, 6.479233°W, 185 m water depth)                                                                      | this study                                                                                                                                                                                   |
|                               | 1f, 5 (Aperture)                                                      | core +56-07/728VE, 0-1 cm (56.81922°N, 6.479233°W, 185 m water depth)                                                                      | this study                                                                                                                                                                                   |
|                               | 1g                                                                    | Expedition 93030, core 031, 3-4 cm (64.28433°N, 24.20700°W, 254 m water depth)                                                             | this study                                                                                                                                                                                   |
|                               | 1h                                                                    | Expedition 93030, core 031, 4-5 cm (64.28433°N, 24.20700°W, 254 m water depth)                                                             | this study                                                                                                                                                                                   |
|                               | 1i                                                                    | Expedition 93030, core 031, 6-7 cm (64.28433°N, 24.20700°W, 254 m water depth)                                                             | this study                                                                                                                                                                                   |
|                               | 2a, 5 (Holotype original illustration)                                | see Supplementary Table S2                                                                                                                 | Seidenkrantz (1995), Plate 1, Fig. 1                                                                                                                                                         |
|                               | 2d, 5 (Chamber arrangement, Chamber shape)                            | Expedition 89200, core A9GC, 0-2 cm (79.66417°N, 104.2375°W, 418 m water depth)                                                            | this study                                                                                                                                                                                   |
| <i>Cassidulina neoteretis</i> | 2e                                                                    | Expedition 89200, core A9GC, 0-2 cm (79.66417°N, 104.2375°W, 418 m water depth)                                                            | this study                                                                                                                                                                                   |
|                               | 2f, 5 (Proloculus area)                                               | Expedition OD1507, core 009MC, 0-2 cm (81.01101°N, 61.276887°W, 931 m water depth)                                                         | Jennings et al. (2020)                                                                                                                                                                       |
|                               | 2g                                                                    | Expedition 89200, A9GC, 0-2 cm (79.66417°N, -104.2375°W, 418 m water depth)                                                                | this study                                                                                                                                                                                   |
|                               | 2h                                                                    | Expedition OD1507, core 023MC, 0-2 cm (81.41148°N, 62.328492°W, 558 m water depth)                                                         | this study                                                                                                                                                                                   |
|                               | 2i                                                                    | Expedition OD1507, core 023MC, 0-2 cm (81.41148°N, 62.328492°W, 558 m water depth)                                                         | this study                                                                                                                                                                                   |
|                               | 2j                                                                    | MGUH no. 22211; Upper Weichselian, core 1007 off Faeroe Islands, North Atlantic (60.74483°N, 4.51483°W, 1125 m water depth), sample no. 18 | Seidenkrantz (1995), Plate 2, Fig. 5                                                                                                                                                         |
|                               | 2o, 5 (Aperture)                                                      | MGUH no. 22212; Upper Weichselian, core 1007 off Faeroe Islands, North Atlantic (60.74483°N, 4.51483°W, 1125 m water depth), sample no. 11 | Seidenkrantz (1995), Plate 2, Fig. 6                                                                                                                                                         |
|                               | 5 (Paratype image)                                                    | see Supplementary Table S2                                                                                                                 | this study                                                                                                                                                                                   |
|                               | 2b, 5 (Holotype original illustration)                                | see Supplementary Table S2                                                                                                                 | Tappan (1951), Plate 1, Fig. 30b                                                                                                                                                             |
|                               | 2c, 5 (Holotype image)                                                | see Supplementary Table S2                                                                                                                 | Paleobiology Collections of the Smithsonian National Museum of Natural History ( <a href="https://collections.nmnh.si.edu/search/paleo/">https://collections.nmnh.si.edu/search/paleo/</a> ) |
| <i>Cassidulina teretis</i>    | 2k                                                                    | MGUH no. 22206; Pliocene, Clyde Foreland, Baffin Island, Canada                                                                            | Seidenkrantz (1995), Plate 1, Fig. 13                                                                                                                                                        |
|                               | 2l, 5 (Chamber arrangement, Chamber shape, Proloculus area)           | MGUH no. 22205; Pliocene, Clyde Foreland, Baffin Island, Canada                                                                            | Seidenkrantz (1995), Plate 1, Fig. 12a                                                                                                                                                       |
|                               | 2m                                                                    | MGUH no. 22223; OPD Hole 644A, lowermost middle Pleistocene                                                                                | Seidenkrantz (1995), Plate 2, Fig. 17                                                                                                                                                        |

|                                    | 2n, 5 (Aperture)                                                      | MGUH no. 22226; Upper Pliocene, Gullfiaks Field, North Sea                                                                                                    | Seidenkrantz (1995), Plate 4, Fig. 2                                                                                                                                                         |
|------------------------------------|-----------------------------------------------------------------------|---------------------------------------------------------------------------------------------------------------------------------------------------------------|----------------------------------------------------------------------------------------------------------------------------------------------------------------------------------------------|
| <i>Paracassidulina neocarinata</i> | 3a, 5 (Holotype original illustration)                                | see Supplementary Table S2                                                                                                                                    | Cushman (1922), Plate 25, Fig. 6                                                                                                                                                             |
|                                    | 3b, 5 (Syntype image)                                                 | see Supplementary Table S2                                                                                                                                    | Paleobiology Collections of the Smithsonian National Museum of Natural History ( <a href="https://collections.nmnh.si.edu/search/paleo/">https://collections.nmnh.si.edu/search/paleo/</a> ) |
|                                    | 3c                                                                    | MGUH no. 22203; Recent, Emerald Basin, off Nova Scotia, Canada                                                                                                | Seidenkrantz (1995), Plate 1, Fig. 10a                                                                                                                                                       |
|                                    | 3d, 5 (Chamber arrangement, Chamber shape, Proloculus area)           | MGUH no. 22203; Recent, Emerald Basin, off Nova Scotia, Canada                                                                                                | Seidenkrantz (1995), Plate 1, Fig. 10b                                                                                                                                                       |
|                                    | 3e                                                                    | MGUH no. 22229; Holocene, Gulf of Maine, USA, sample E-2F-92-C2, 425 m below sea floor; Specimen provided by Prof. Detmar Schnitger, University of Maine, USA | Seidenkrantz (1995), Plate 5, Fig. 9                                                                                                                                                         |
| <i>Islandiella helenae</i>         | 3f, 5 (Aperture)                                                      | MGUH no. 22229; Holocene, Gulf of Maine, USA, sample E-2F-92-C2, 425 m below sea floor; Specimen provided by Prof. Detmar Schnitger, University of Maine, USA | Seidenkrantz (1995), Plate 4, Fig. 7                                                                                                                                                         |
|                                    | 4a                                                                    | Expedition 89200, core A9GC, 0-2 cm (79.66417°N, 104.2375°W, 418 m water depth)                                                                               | this study                                                                                                                                                                                   |
|                                    | 4b, 5 (Aperture)                                                      | Expedition 89200, core A9GC, 0-2 cm (79.66417°N, 104.2375°W, 418 m water depth)                                                                               | this study                                                                                                                                                                                   |
|                                    | 4c, 5 (Aperture, Chamber arrangement, Chamber shape, Proloculus area) | Expedition 2008029, core 042PC, 800 cm (75.57939°N, 78.629571°W, 580 m water depth)                                                                           | this study                                                                                                                                                                                   |
|                                    | 4d, 5 (Holotype original illustration)                                | see Supplementary Table S2                                                                                                                                    | Loeblich and Tappan (1953), Plate 24, Fig. 4b                                                                                                                                                |
| <i>Islandiella norcrossi</i>       | 4e, 5 (Holotype original illustration)                                | see Supplementary Table S2                                                                                                                                    | Cushman (1933), Plate 2, Fig. 7b                                                                                                                                                             |
|                                    | 4f, 5 (Holotype image)                                                | see Supplementary Table S2                                                                                                                                    | Paleobiology Collections of the Smithsonian National Museum of Natural History ( <a href="https://collections.nmnh.si.edu/search/paleo/">https://collections.nmnh.si.edu/search/paleo/</a> ) |
|                                    | 4g                                                                    | Expedition PS100, giant boxcore 144, 0-1 cm, (77.12633°N, 10.56983°W, 494 m water depth)                                                                      | this study                                                                                                                                                                                   |
|                                    | 4h, 5 (Proloculus area)                                               | Expedition 2011804, core 0011BC, 0-1 cm (74.159666°N, 80.600333°W, 779 m water depth)                                                                         | this study                                                                                                                                                                                   |
|                                    | 4i                                                                    | Expedition 2011804, core 0002BC, 0-1 cm (69.163833°N, 100.71217°W, 63 m water depth)                                                                          | this study                                                                                                                                                                                   |
|                                    | 4j, 5 (Chamber arrangement, Chamber shape)                            | Expedition 2011804, core 0013BC, 0-1 cm (76.329333°N, 71.222666°W, 658 m water depth)                                                                         | this study                                                                                                                                                                                   |
|                                    | 4k, 5 (Aperture)                                                      | Expedition 2011804, core 0013BC, 0-1 cm (76.329333°N, 71.222666°W, 658 m water depth)                                                                         | this study                                                                                                                                                                                   |
|                                    | 4l, 5 (Aperture)                                                      | Expedition 2011804, core 0013BC, 0-1 cm (76.329333°N, 71.222666°W, 658 m water depth)                                                                         | this study                                                                                                                                                                                   |
|                                    |                                                                       |                                                                                                                                                               |                                                                                                                                                                                              |

**Abbreviations:**

MGUH = Natural History Museum of Denmark Palaeontology Type Collection (<https://samlinger.snm.ku.dk/en/dry-and-wet-collections/geology/palaeontology-type-collection/>)

**References:**

- Cushman, J.A.: The foraminifera of the Atlantic Ocean, US National Museum Bulletin, 104, pt. 3, 1-149, 1922.
- Cushman, J.A.: New arctic foraminifera collected by Captain R.A. Bartlett from Fox Basin and of the northeast coast of Greenland, Smithsonian Miscellaneous Collection, 89, 1-8, 1933.
- d'Orbigny, A. D.: Tableau méthodique de la classe des Céphalopodes, Ann. Sci. Nat., 7, 245-314, 1826.
- Jennings, A., Andrews, J.T., Reilly, B., Walczak, M., Jakobsson, M., Mix, A., Stoner, J., Nicholls, K.W., Cheseby, M.: Modern foraminiferal assemblages in northern Nares Strait, Petermann Fjord, and beneath Peterman Ice Tongue, NW Greenland, Arct. Antarct. Alp. Res., 51:1, 491-511, 2020.
- Loeblich, A.R. and Tappan, H.: Studies of Arctic Foraminifera. Smithsonian Misc. Coll., 121 (7), 1-150, 1953.
- Seidenkrantz, M.-S.: Cassidulina teretis Tappan and Cassidulina neoteretis new species (Foraminifera): stratigraphic markers for deep sea and outer shelf areas, J. Micropalaeon., 14, 145-157, 1995.
- Tappan, H.: Northern Alaska index Foraminifera, Contr. Cushman Found. Foramin. Res., 2, 1-8, 1951.

Cage et al., Supplementary Table 2

| Species                                               | Type level                    | Type locality                                                                                | Type specimen                                                                   | Comments/reference                                                                                                                                                                                                                                                                                         |
|-------------------------------------------------------|-------------------------------|----------------------------------------------------------------------------------------------|---------------------------------------------------------------------------------|------------------------------------------------------------------------------------------------------------------------------------------------------------------------------------------------------------------------------------------------------------------------------------------------------------|
| <i>Cassidulina laevigata</i><br><i>Holotype</i>       | Not given                     | Not given                                                                                    | Not given                                                                       | d'Orbigny (1826)                                                                                                                                                                                                                                                                                           |
| <i>Cassidulina neoteretis</i><br><i>Holotype</i>      | Late Weichselian              | Boring 1007 off Faeroe Islands (60°44.69'N, 4°30.89'W; 1125 m water depth), sample 19        | Dept. of Earth Sciences, Aarhus University; holotype no. MGUH 22189             | Seidenkrantz (1995)                                                                                                                                                                                                                                                                                        |
| <i>Paratype</i>                                       | Late Weichselian              | Boring 1007 off Faeroe Islands (60°44.69'N, 4°30.89'W; 1125 m water depth), sample 19        | Dept. of Earth Sciences, Aarhus University; holotype no. MGUH 22195             | re-imaged for this study                                                                                                                                                                                                                                                                                   |
| <i>Cassidulina teretis</i><br><i>Holotype</i>         | Pleistocene (Gubik Formation) | Core at 100-105 ft in Point Barrow Core Test 1, N-NE of Barrow village, N Alaska             | US National Museum of Natural History, Washington DC; holotype no. USNM 560409  | Tappan (1951); re-imaged in the Paleobiology Collections of the Smithsonian National Museum of Natural History ( <a href="https://collections.nmnh.si.edu/search/paleo/">https://collections.nmnh.si.edu/search/paleo/</a> )                                                                               |
| <i>Paracassidulina neocarinata</i><br><i>Holotype</i> | Recent                        | Ragged Key (75 fathoms water depth), Florida                                                 | US National Museum of Natural History, Washington DC; holotype no. USNM 16375a  | Cushman (1922)                                                                                                                                                                                                                                                                                             |
| <i>Syntype</i>                                        | Recent                        | Ragged Key (75 fathoms water depth), Florida                                                 | US National Museum of Natural History, Washington DC; syntype no. USNM PP 16375 | Specimen from Cushman (1922) material as <i>Cassidulina laevigata</i> var. <i>carinata</i> ; re-imaged in the Paleobiology Collections of the Smithsonian National Museum of Natural History ( <a href="https://collections.nmnh.si.edu/search/paleo/">https://collections.nmnh.si.edu/search/paleo/</a> ) |
| <i>Islandiella helenae</i><br><i>Holotype</i>         | Recent                        | 3 miles offshore (37 m water depth) btw. Point Barrow Base Camp and Barrow village, N Alaska | US National Museum of Natural History, Washington DC; holotype no. USNM P 2107b | Original illustration by Loeblich and Tappan (1953) as <i>Cassidulina teretis</i> ; erected as a new species by Feyling-Hanssen and Buzas (1976)                                                                                                                                                           |
| <i>Islandiella norcrossi</i><br><i>Holotype</i>       | Recent                        | 5 miles off (7 fathoms water depth) Cape Borlase Warren, NE Greenland                        | US National Museum of Natural History, Washington DC; holotype no. USNM 26139   | Cushman (1933); re-imaged in the Paleobiology Collections of the Smithsonian National Museum of Natural History ( <a href="https://collections.nmnh.si.edu/search/paleo/">https://collections.nmnh.si.edu/search/paleo/</a> )                                                                              |

References:

Cushman, J.A.: The foraminifera of the Atlantic Ocean, US National Museum Bulletin, 104, pt. 3, 1-149, 1922.  
Cushman, J.A.: New arctic foraminifera collected by Captain R.A. Bartlett from Fox Basin and of the northeast coast of Greenland, Smithsonian Miscellaneous Collection, 89, 1-8, 1933.

- d'Orbigny, A. D.: Tableau méthodique de la classe des Céphalopodes, Ann. Sci. Nat., 7, 245—314, 1826.
- Feyling-Hanssen, R.W. and Buzas, M.A.: Emendation of *Cassidulina* and *Islandiella helenae* new species, J. Foramin. Res., 6, 154-158, 1976.
- Loeblich, A.R. and Tappan, H.: Studies of Arctic Foraminifera. Smithsonian Misc. Coll., 121 (7), 1-150, 1953.
- Seldenkrantz, M.-S.: *Cassidulina teretis* Tappan and *Cassidulina neoteretis* new species (Foraminifera): stratigraphic markers for deep sea and outer shelf areas, J. Micropalaeon., 14, 145-157, 1995.
- Tappan, H.: Northern Alaska index Foraminifera, Contr. Cushman Found. Foramin. Res., 2, 1-8, 1951.
